# Supplementary material for: Extraction of a Triterpene Solution and Evaluation of the Hypolipidemic Efficacy of the Pleurotus tuber-regium (Fr.) Sing Sclerotium
Source: MDPI journal article supplement (doi:10.3390/foods11182881), 2022-09-16
Supplement: s1 [file s1]

Supplementary Information

# Extraction of a Triterpene Solution and Evaluation of the Hypolipidemic Efficacy of the *Pleurotus tuber-regium* (Fr.) Sing Sclerotium

Chao Wang \*, Yuan Liu, Yuanhong Lan and Jianing Yuan

College of Food and Health, Zhejiang A & F University, Hangzhou 311300, China

\* Correspondence: tianshan@zafu.edu.cn

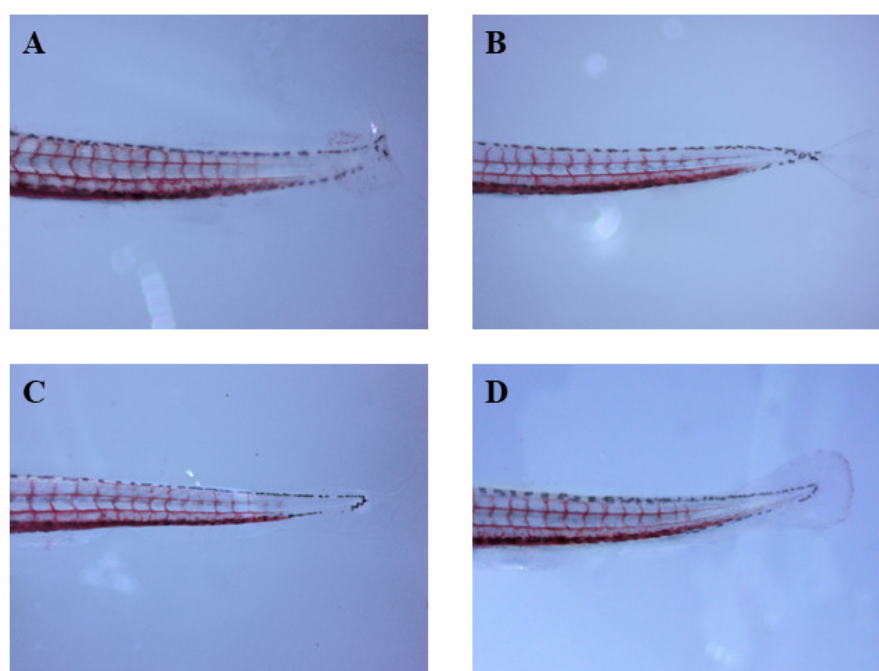

**Figure S1.** The staining results of lipid accumulation in zebrafish. Note: A, B, C and D are zebrafish fed with total triterpenoid concentrations of 0 µg/mL, 100 µg/mL, 300 µg/mL and 500 µg/mL, respectively.
